# Supplementary material for: Preliminary Study on Human Adipose Stem Cells Promoting Skin Wound Healing Through Notch1 Signaling Pathway
Source: Research Square preprint supplement (doi:10.21203/rs.3.rs-1198920/v1), 2022-01-06
Supplement: Supplementary file 1 [file 9ec301f837d5514fabe51892.xlsx]

## Sheet: Sheet1
Matrix ID	Name	Score	Relative score	Sequence ID	Start	End	Strand	Sequence
11907	MA0616.2.HES2	16.1882	1	NC_000017.11:59891121-59893220	153	162	+	GGCACGTGCC
11907	MA0616.2.HES2	16.1882	1	NC_000017.11:59891121-59893220	153	162	-	GGCACGTGCC
13159	MA0821.2.HES5	15.1971	1	NC_000017.11:59891121-59893220	153	162	+	GGCACGTGCC
13159	MA0821.2.HES5	15.1971	1	NC_000017.11:59891121-59893220	153	162	-	GGCACGTGCC
11906	MA1099.2.HES1	14.4264	0.999431	NC_000017.11:59891121-59893220	153	162	+	GGCACGTGCC
11906	MA1099.2.HES1	14.4264	0.999431	NC_000017.11:59891121-59893220	153	162	-	GGCACGTGCC
10822	MA0649.1.HEY2	15.5375	0.998692	NC_000017.11:59891121-59893220	153	162	+	GGCACGTGCC
10822	MA0649.1.HEY2	15.5375	0.998692	NC_000017.11:59891121-59893220	153	162	-	GGCACGTGCC
11036	MA0823.1.HEY1	15.6081	0.996506	NC_000017.11:59891121-59893220	153	162	+	GGCACGTGCC
11036	MA0823.1.HEY1	15.6081	0.996506	NC_000017.11:59891121-59893220	153	162	-	GGCACGTGCC
11035	MA0822.1.HES7	19.0547	0.971732	NC_000017.11:59891121-59893220	152	163	+	AGGCACGTGCCA
11035	MA0822.1.HES7	18.6492	0.966723	NC_000017.11:59891121-59893220	152	163	-	TGGCACGTGCCT
11748	MA1493.1.HES6	12.8217	0.920265	NC_000017.11:59891121-59893220	153	162	+	GGCACGTGCC
11748	MA1493.1.HES6	12.8217	0.920265	NC_000017.11:59891121-59893220	153	162	-	GGCACGTGCC
