# Supplementary material for: Preliminary Study on Human Adipose Stem Cells Promoting Skin Wound Healing Through Notch1 Signaling Pathway
Source: Research Square preprint supplement (doi:10.21203/rs.3.rs-1198920/v1), 2022-01-06
Supplement: Supplementary file 2 [file bc6f13f9b8cb018f4b195e4f.xlsx]

## Sheet: Sheet1
Matrix ID	Name	Score	Relative score	Sequence ID	Start	End	Strand	Sequence
10822	MA0649.1.HEY2	13.3895	0.958087	NC_000002.12:172553373-172555472	1601	1610	+	GGCACGTGTT
10822	MA0649.1.HEY2	11.9025	0.929977	NC_000002.12:172553373-172555472	1638	1647	-	GACGCGTGCC
10822	MA0649.1.HEY2	11.6661	0.925509	NC_000002.12:172553373-172555472	1601	1610	-	AACACGTGCC
10822	MA0649.1.HEY2	11.278	0.918172	NC_000002.12:172553373-172555472	1638	1647	+	GGCACGCGTC
11036	MA0823.1.HEY1	13.8044	0.963899	NC_000002.12:172553373-172555472	1601	1610	-	AACACGTGCC
11036	MA0823.1.HEY1	11.8738	0.928998	NC_000002.12:172553373-172555472	1601	1610	+	GGCACGTGTT
11036	MA0823.1.HEY1	11.8121	0.927882	NC_000002.12:172553373-172555472	1638	1647	+	GGCACGCGTC
11036	MA0823.1.HEY1	11.1947	0.916722	NC_000002.12:172553373-172555472	1638	1647	-	GACGCGTGCC
11748	MA1493.1.HES6	17.338	1	NC_000002.12:172553373-172555472	1601	1610	+	GGCACGTGTT
11748	MA1493.1.HES6	11.7349	0.901076	NC_000002.12:172553373-172555472	1638	1647	+	GGCACGCGTC
11906	MA1099.2.HES1	12.715	0.972263	NC_000002.12:172553373-172555472	1638	1647	-	GACGCGTGCC
11906	MA1099.2.HES1	12.1223	0.962855	NC_000002.12:172553373-172555472	1601	1610	+	GGCACGTGTT
11906	MA1099.2.HES1	11.8893	0.959155	NC_000002.12:172553373-172555472	1638	1647	+	GGCACGCGTC
11906	MA1099.2.HES1	10.305	0.934006	NC_000002.12:172553373-172555472	1601	1610	-	AACACGTGCC
11907	MA0616.2.HES2	14.1816	0.966507	NC_000002.12:172553373-172555472	1601	1610	+	GGCACGTGTT
11907	MA0616.2.HES2	12.9998	0.94678	NC_000002.12:172553373-172555472	1638	1647	+	GGCACGCGTC
11907	MA0616.2.HES2	12.0501	0.930927	NC_000002.12:172553373-172555472	1638	1647	-	GACGCGTGCC
11907	MA0616.2.HES2	10.2969	0.901663	NC_000002.12:172553373-172555472	1601	1610	-	AACACGTGCC
13159	MA0821.2.HES5	12.9074	0.956027	NC_000002.12:172553373-172555472	1601	1610	-	AACACGTGCC
13159	MA0821.2.HES5	12.9039	0.95596	NC_000002.12:172553373-172555472	1601	1610	+	GGCACGTGTT
13159	MA0821.2.HES5	12.4182	0.946633	NC_000002.12:172553373-172555472	1638	1647	-	GACGCGTGCC
13159	MA0821.2.HES5	12.4079	0.946435	NC_000002.12:172553373-172555472	1638	1647	+	GGCACGCGTC
